# Supplementary material for: Carotenoid biosynthesis of pak choi (Brassica rapa ssp. chinensis) sprouts grown under different light-emitting diodes during the diurnal course
Source: Royal Society of Chemistry journal article supplement (doi:10.1039/c8pp00136g), 2018-08-01
Supplement: c8pp00136g1.pdf [file c8pp00136g1.pdf]

## Supplementary Information

**Title: Carotenoid biosynthesis of pak choi (*Brassica rapa* ssp. *chinensis*) sprouts grown under different light-emitting diodes during the diurnal course**

### Authors:

Katja **Frede**<sup>ab</sup>, ([frede@igzev.de](mailto:frede@igzev.de)); Monika **Schreiner**<sup>a</sup>, ([schreiner@igzev.de](mailto:schreiner@igzev.de)); Rita **Zrenner**<sup>a</sup>, ([zrenner@igzev.de](mailto:zrenner@igzev.de)); Jan **Graefe**<sup>a</sup>, ([graefe@igzev.de](mailto:graefe@igzev.de)); Susanne **Baldermann**<sup>ab</sup>, ([baldermann@igzev.de](mailto:baldermann@igzev.de))

### Affiliations:

<sup>a</sup> Leibniz Institute of Vegetable and Ornamental Crops, Plant Quality and Food Security, Theodor-Echtermeyer-Weg 1, 14979 Großbeeren, Germany

<sup>b</sup> University of Potsdam, Institute of Nutritional Science, Department of Food Chemistry, Arthur-Scheunert-Allee 114-116, 14558 Nuthetal, Germany

**Table S1.** Primer pairs used for gene expression analysis by RT-qPCR

| Protein ( <i>gene name</i> )                                         | Primer pairs (5' to 3')           |                               | E (%) |
|----------------------------------------------------------------------|-----------------------------------|-------------------------------|-------|
| <b>Carotenoid biosynthesis genes</b>                                 |                                   |                               |       |
| Phytoene synthase ( <i>PSY</i> )                                     | F: GATACCCTGTCGATATTCAGCCATTTAGAG | R: CCCATAACCGGAACGCTCATCA     | 87    |
| Phytoene desaturase ( <i>PDS</i> )                                   | F: CCATGTCGTCAAACTCCAAGGTC        | R: GAGCAGAATTTGCCAGAGAGAACG   | 95    |
| $\epsilon$ -Cyclase ( <i>ELCY</i> )                                  | F: CTACGGTGTTTGGGAAGATGAGTT       | R: TGGAGCTAAGATACGAGACACCTGAC | 97    |
| $\beta$ -Cyclase ( <i><math>\beta</math>LCY</i> )                    | F: CCCGTTTGATGTGGATAAGATGGTG      | R: CCGGCCTAGCGACAAGAGACG      | 94    |
| $\beta$ -Carotene hydroxylase 1 ( <i><math>\beta</math>-OHASE1</i> ) | F: TCTTGCCAAATGGAGGGAGGTG         | R: CAAAGAGAAGCGTGCCAGAGAGC    | 93    |
| Cytochrome P450 97C1 ( <i>CYP97C1</i> )                              | F: GCGAAAGCACAAAGAGGAAGTAGAC      | R: CAAGACAGGAGGATGAGGGTAGAG   | 90    |
| Cytochrome P450 97A3 ( <i>CYP97A3</i> )                              | F: GAGCCTTCACTGTACGCAATCCA        | R: ATCTTCGTTAGCTCCGGTCCAATC   | 77    |
| Zeaxanthin epoxidase ( <i>ZEP</i> )                                  | F: GGTGTTGGGCTTGGTCTCTCTC         | R: GGCGGTCATCAGCTTTGTCACTG    | 90    |
| Violaxanthin de-epoxidase ( <i>VDE</i> )                             | F: GGTGTTGTAGCTTGC GCGTTTCTC      | R: TTGGCTGCACAGGAAGGGTTG      | 95    |
| <b>Carotenoid degradation gene</b>                                   |                                   |                               |       |
| Carotenoid cleavage dioxygenase 4 ( <i>CCD4</i> )                    | F: GCTTTCTTCTGTAACCGCCTCTTC       | R: CTGTCATGCTCATCGCTAACTTCC   | 98    |
| <b>Transcription factors</b>                                         |                                   |                               |       |
| Elongated hypocotyl 5 ( <i>HY5</i> )                                 | F: AAGAGAGAGGAAGAAAGCTTACTTGGGTG  | R: CCTCCTCTTGTTCCTGTTGTGTTC   | 96    |
| Circadian clock associated 1 ( <i>CCA1</i> )                         | F: TCACGGGAACAGGGGAATAACAAG       | R: GGACTGATGATGGCCTGAAACTGTG  | 100   |
| <b>Reference genes</b>                                               |                                   |                               |       |
| Actin 2 ( <i>ACT2</i> ) <sup>a</sup>                                 | F: ACGTGGACATCAGGAAGGAC           | R: CTTGGTGCAAGTGCTGTGAT       | 94    |
| Ubiquitin-conjugating enzyme E2 30 ( <i>UBC30</i> )                  | F: CACTGGCAAGCAACTATTATGGGTCC     | R: CATTGCTGTTGATGTTCCGGGTGATA | 99    |
| Elongation factor 1-alpha ( <i>EF1<math>\alpha</math></i> )          | F: CCCAAGTTTTTGAAGAATGGTGA        | R: ACGGTCTGCCTCATGTCCCT       | 89    |

E, Amplification efficiency; a, (Wiesner *et al.*, 2013)

**Wiesner M, Zrenner R, Krumbein A, Glatt H, Schreiner M.** 2013. Genotypic variation of the glucosinolate profile in pak choi (*Brassica rapa* ssp. *chinensis*). Journal of Agricultural and Food Chemistry **61**, 1943-1953.

**Table S2.** Accession numbers of the nucleotide sequences used for primer design

| <b>Gene name</b> | <b>BRAD gene ID</b> | <b>GenBank accession number</b> |
|------------------|---------------------|---------------------------------|
| <i>PSY</i>       | Bra023603           | XM_009127923.2                  |
|                  | Bra006391           | XM_009133335.2                  |
|                  | Bra008569           | XM_009123157.2                  |
| <i>PDS</i>       | Bra032770           | XM_009141294.2                  |
|                  | Bra010751           | XM_009111318.2                  |
| <i>εLCY</i>      | Bra020718           | XM_009131456.2                  |
|                  | Bra006838           | XM_009133907.2                  |
|                  | Bra002769           | XM_009121973.2                  |
| <i>βLCY</i>      | Bra029825           | XM_009148612.2                  |
| <i>β-OHASE1</i>  | Bra013912           | GQ178285.1                      |
|                  | Bra019145           | NM_001301961.1                  |
| <i>CYP97C1</i>   | -                   | CX193390.1                      |
| <i>CYP97A3</i>   | Bra038437           | XM_009109855.2                  |
| <i>ZEP</i>       | Bra037130           | XM_009114104.2                  |
|                  | Bra012127           | XM_009105212.2                  |
| <i>VDE</i>       | Bra018616           | XM_009149862.2                  |
| <i>CCD4</i>      | Bra013378           | XM_009134330.2                  |
|                  | Bra020970           | XM_009110169.2                  |
| <i>HY5</i>       | Bra008976           | XM_009123723.2                  |
|                  | Bra023317           | XM_009127550.2                  |
| <i>CCA1</i>      | Bra004503           | XM_009144346.2                  |
| <i>UBC30</i>     | Bra035605           | XM_009128717.2                  |
| <i>EF1α</i>      | Bra020251           | XM_009128363.2                  |
|                  | Bra031605           | XR_628112.1                     |
|                  | Bra018242           | XM_009145956.2                  |
|                  | Bra030707           | XM_009112667.2                  |
|                  | Bra018669           | XM_009149797.2                  |
|                  | Bra006661           | XM_009133668.2                  |
|                  | Bra020253           | XM_009128361.2                  |
|                  | Bra002483           | XM_009122323.1                  |
| Bra031602        | XM_009120161.2      |                                 |

BRAD, Brassica database (<http://brassicadb.org/brad/>)

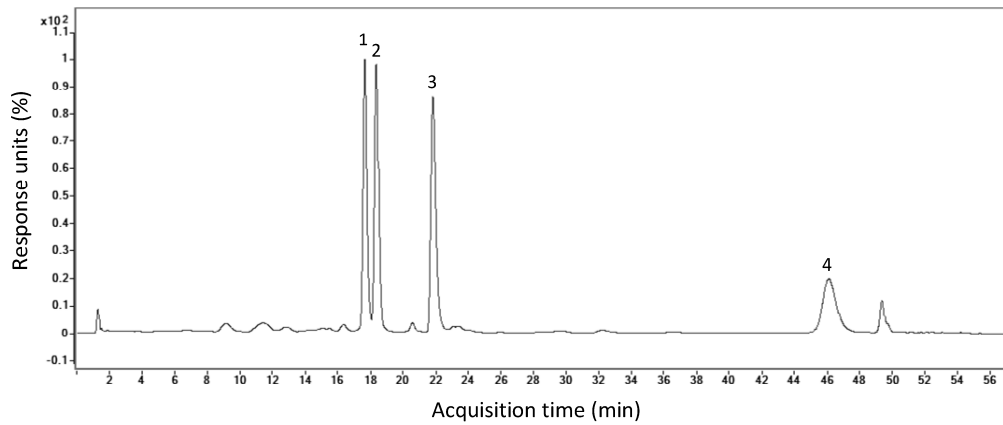

**Fig. S1** Characteristic chromatogram (450 nm) of carotenoids and chlorophylls in pak choi grown under white LEDs: 1 chlorophyll a; 2 lutein; 3 chlorophyll b; 4  $\beta$ -carotene

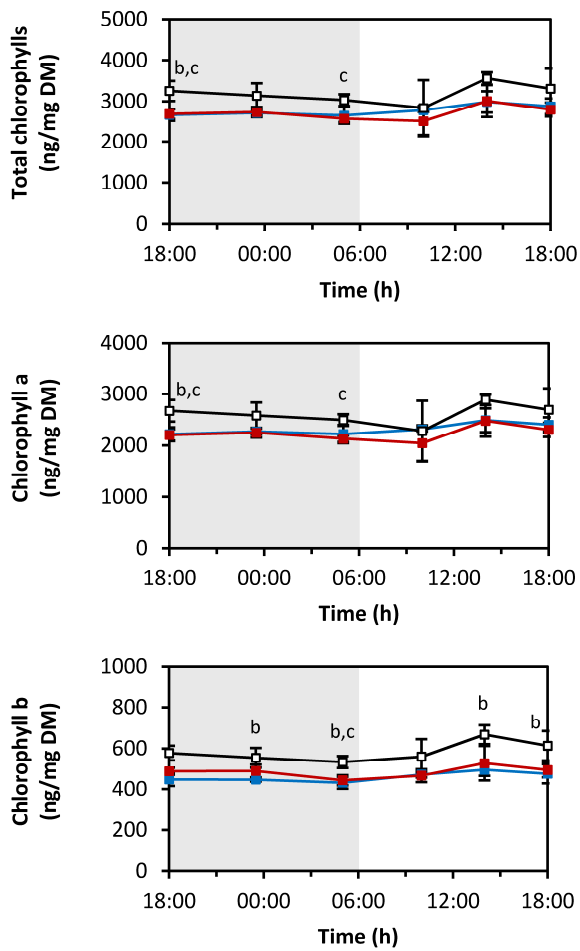

**Fig. S2** Diurnal chlorophyll concentrations in pak choi sprouts grown under three different light qualities. Sprouts were germinated in complete darkness for five days. Subsequently, the sprouts were grown under blue, red or white LEDs for six days and were harvested throughout the final day. Chlorophylls were determined by LC-ToF-MS analysis. Values are presented as mean  $\pm$  SD ( $n = 3$ ). The marker fill colours of the data series match the LED colours. Significant differences ( $p \leq 0.05$ ) are indicated by lower case letters (b – blue significantly different to white, c – red significantly different to white).
